# Supplementary material for: Rationally designed Cu(ii) Schiff base metal complex anchored on NiFe2O4@chitosan: an efficient heterogeneous and magnetically retrievable hybrid nanocatalyst for the one-pot multi-component synthesis of bioactive 1-amidoalkyl-2-naphthols
Source: Royal Society of Chemistry journal article supplement (doi:10.1039/d4dt03009e), 2024-12-17
Supplement: d4dt03009e1.pdf [file d4dt03009e1.pdf]

## **Rationally designed Cu(II) Schiff base metal complex anchored on NiFe<sub>2</sub>O<sub>4</sub>@Chitosan: An efficient heterogeneous and magnetically retrievable hybrid nanocatalyst for the one-pot multi-component synthesis of bioactive 1-amidoalkyl-2-naphthols**

Sneha Paul<sup>a</sup>, Pranjit Barman <sup>a\*</sup>

<sup>a</sup>Department of Chemistry, National Institute of Technology, Silchar, Assam 788010, India

\*Corresponding author: Prof. Pranjit Barman, Department of Chemistry, National Institute of Technology, Silchar, Assam 788010, India.

Email id:barmanpranjit@yahoo.co.in; pranjit@che.nits.ac.in; Contact no: +91-9435374128

### **Supplementary Information**

#### **Experimental**

##### **Materials and methods**

FeCl<sub>3</sub>.6H<sub>2</sub>O, NiCl<sub>2</sub>.6H<sub>2</sub>O, 4-(diethylamino)-salicylaldehyde, Cu(OAc)<sub>2</sub>.H<sub>2</sub>O, ethanol, and Chitosan(CS) were acquired from SRL Chemical without undergoing further purification.

With KBr pellets, IR (infrared) spectra were obtained on a Bruker 3000 Hyperion Microscope that was set up with a Vertex 80 FT-IR system. The crystal phases were investigated using a Panalytical Xpert3 X-ray diffractometer that was outfitted with Cu-K $\alpha$  radiation ( $\lambda = 1.54 \text{ \AA}$ ). Jeol 6390LA/OXFORD XMX N SEM instrument was utilized to confirm the surface structure of the composite. With the JEOL Model 2100 F, TEM images are captured. Nova Touch LX<sub>2</sub> gas sorption analyzer from Quantachrome Instruments was used to measure the BET surface area and pore size distribution of materials. Microsense EV7 Vibrating Sample Magnetometer was used to detect the magnetic properties. X-ray photoelectron spectroscopy (XPS) was performed using a PHI 5000 VERSA Probe III (ULVAC PHI, USA). Inductively Coupled Plasma- Atomic Emission Spectroscopy (ICP-AES) was performed using ARCOS, Simultaneous ICP spectrometer.

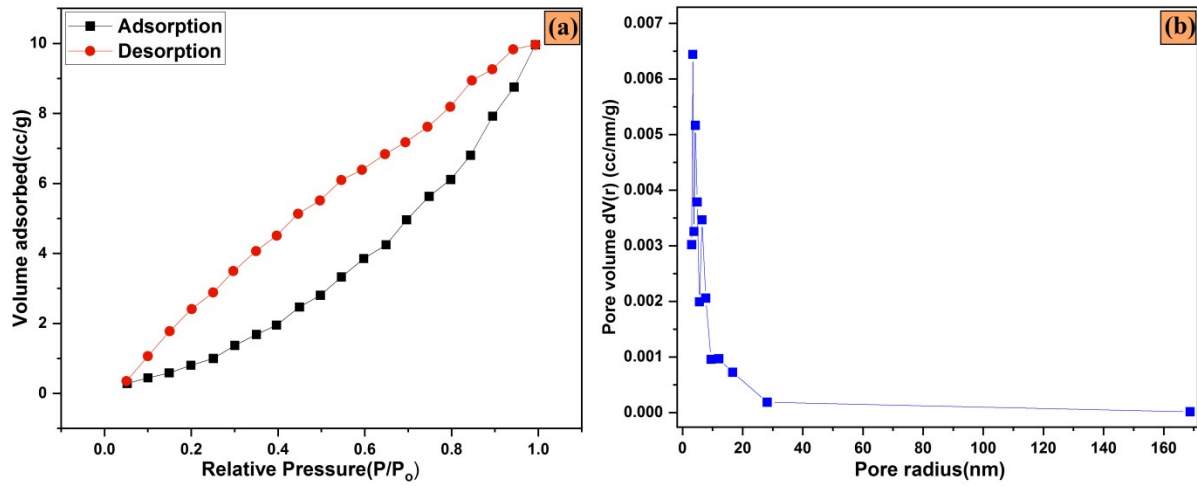

**Fig. S1. (a) N<sub>2</sub> adsorption/desorption isotherm and (b) BJH plot for pore-size distribution of NiFe<sub>2</sub>O<sub>4</sub>@CS@CuSB**

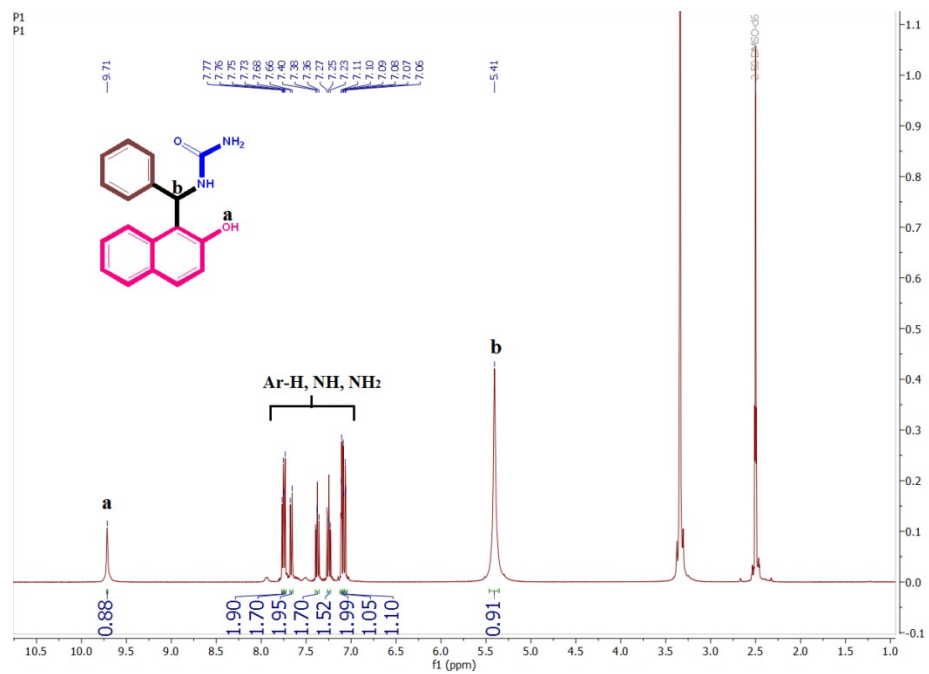

Fig.S2(a).  $^1\text{H}$  NMR spectra of 4a

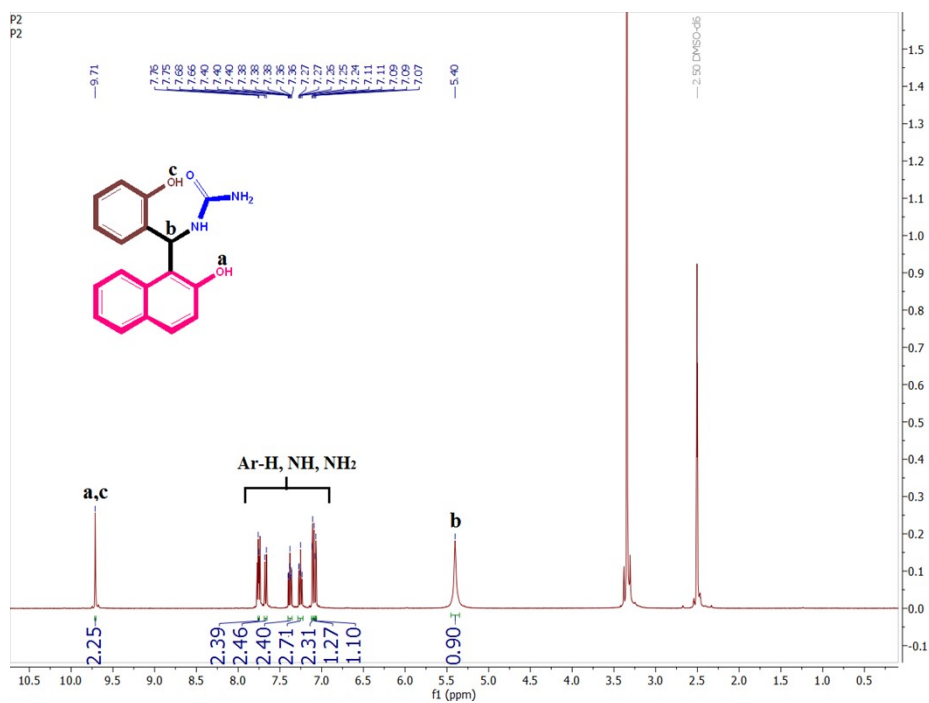

Fig.S2(b).  $^1\text{H}$  NMR spectra of 4b

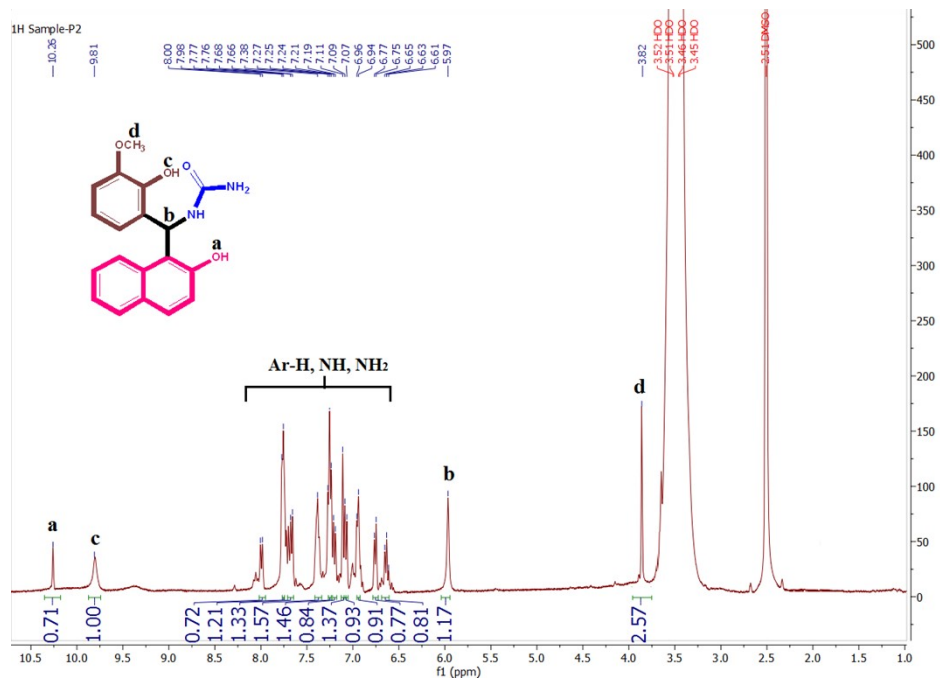

Fig.S2(c). <sup>1</sup>H NMR spectra of 4c

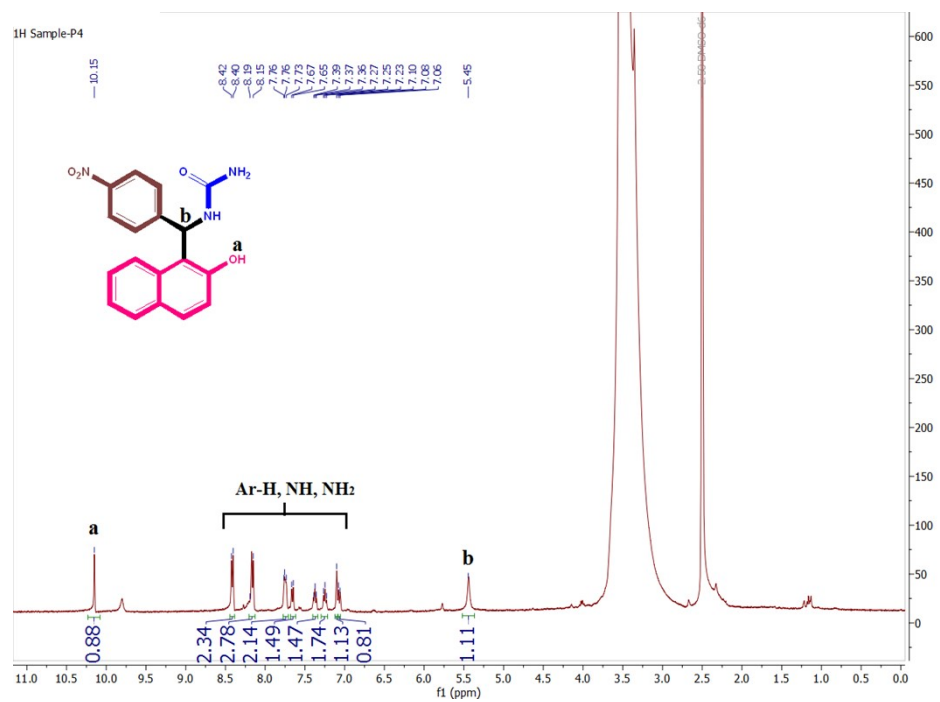

Fig.S2(d). <sup>1</sup>H NMR spectra of 4d

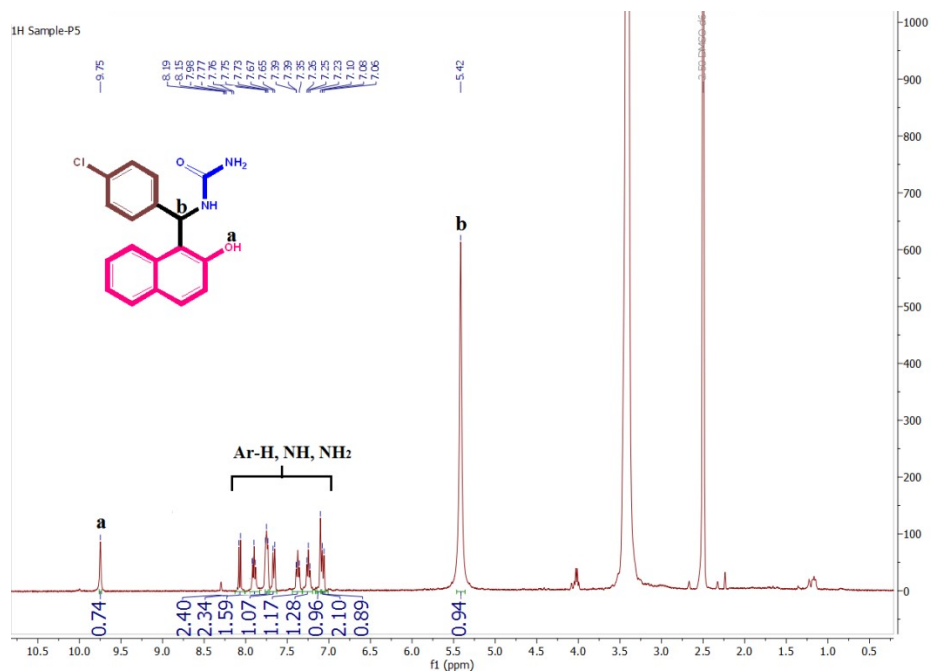

Fig.S2(e). <sup>1</sup>H NMR spectra of 4e

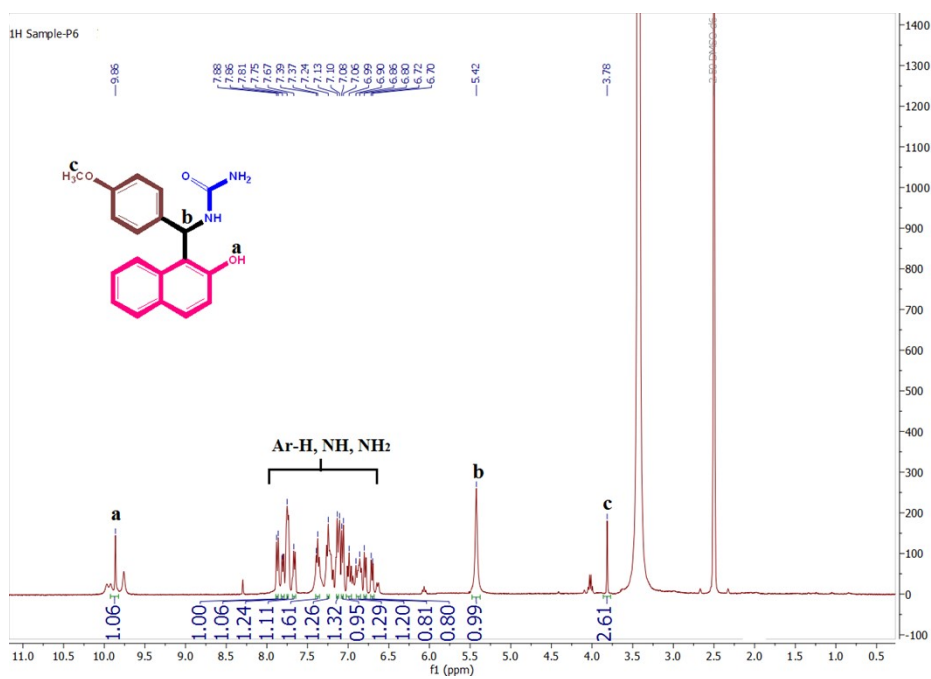

Fig.S2(f). <sup>1</sup>H NMR spectra of 4f

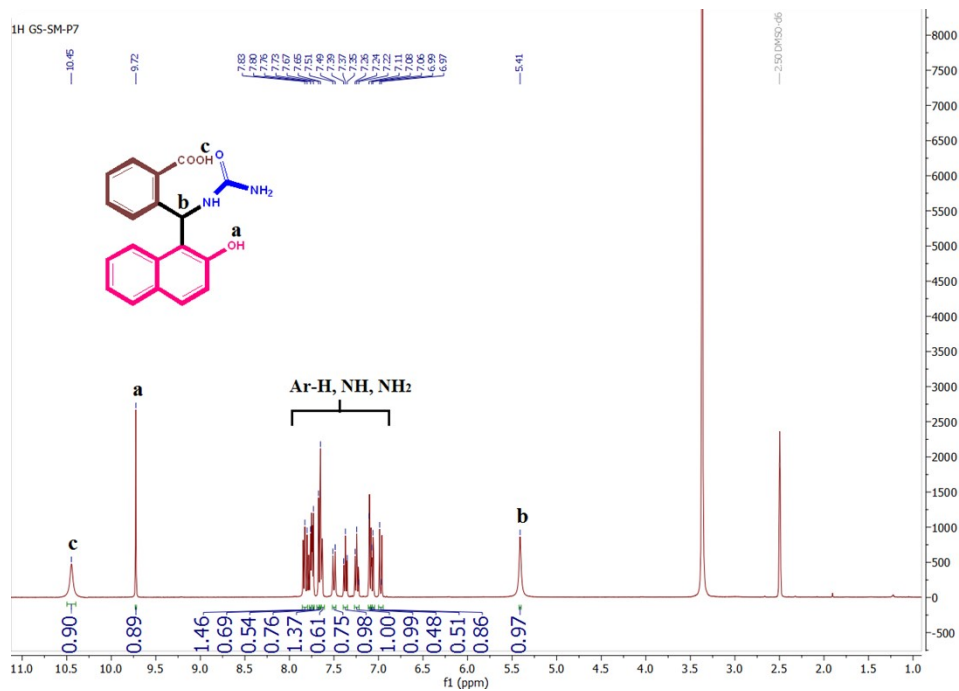

Fig.S2(g). <sup>1</sup>H NMR spectra of 4g

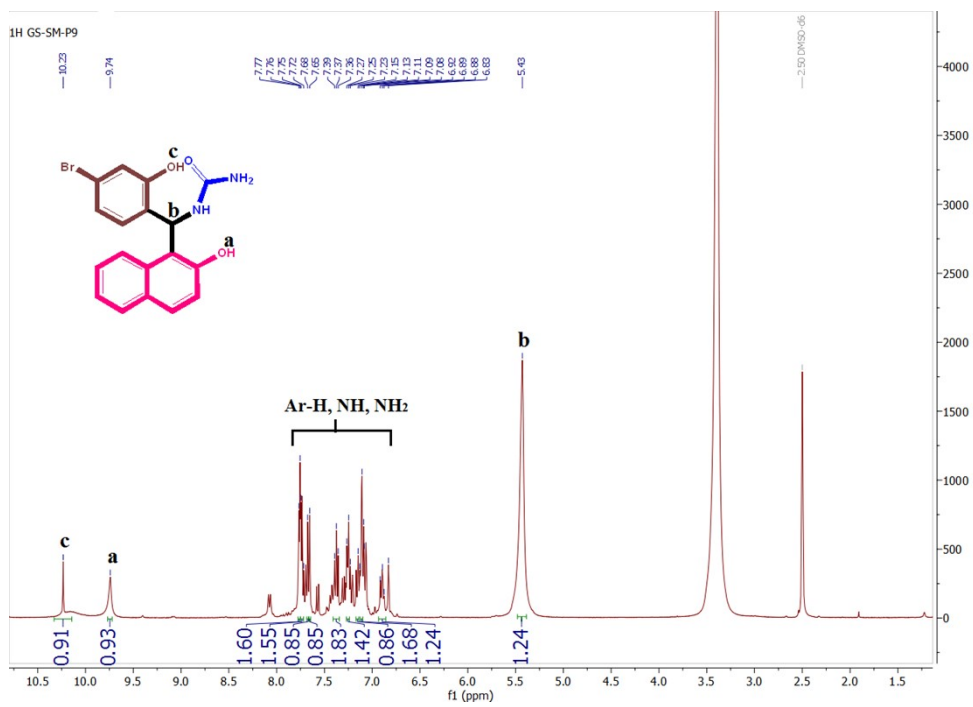

Fig.S2(h). <sup>1</sup>H NMR spectra of 4h

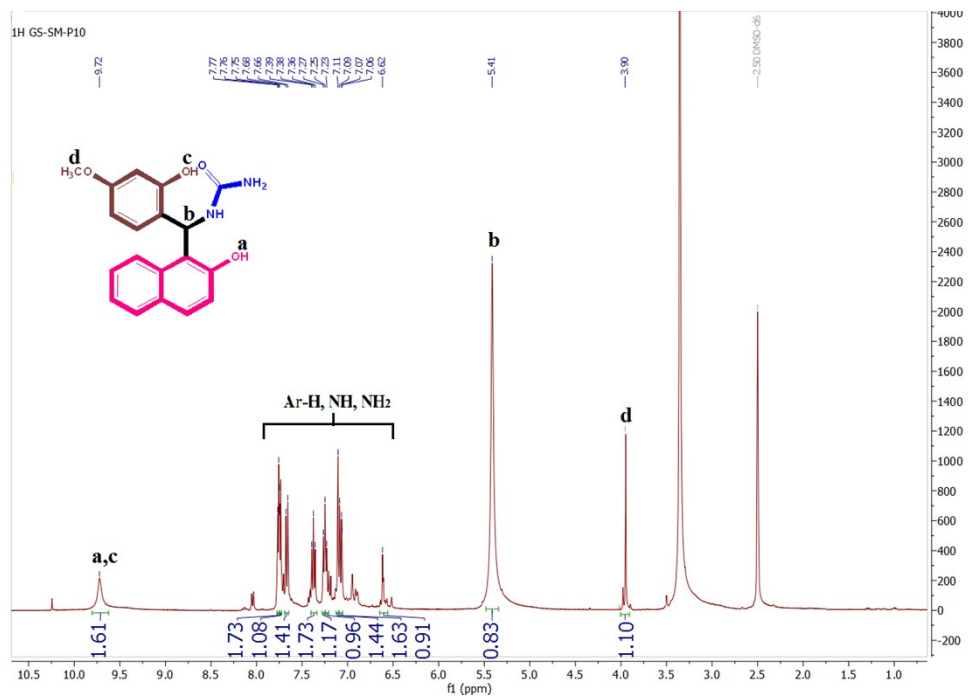

Fig.S2(i).  $^1\text{H}$  NMR spectra of 4i

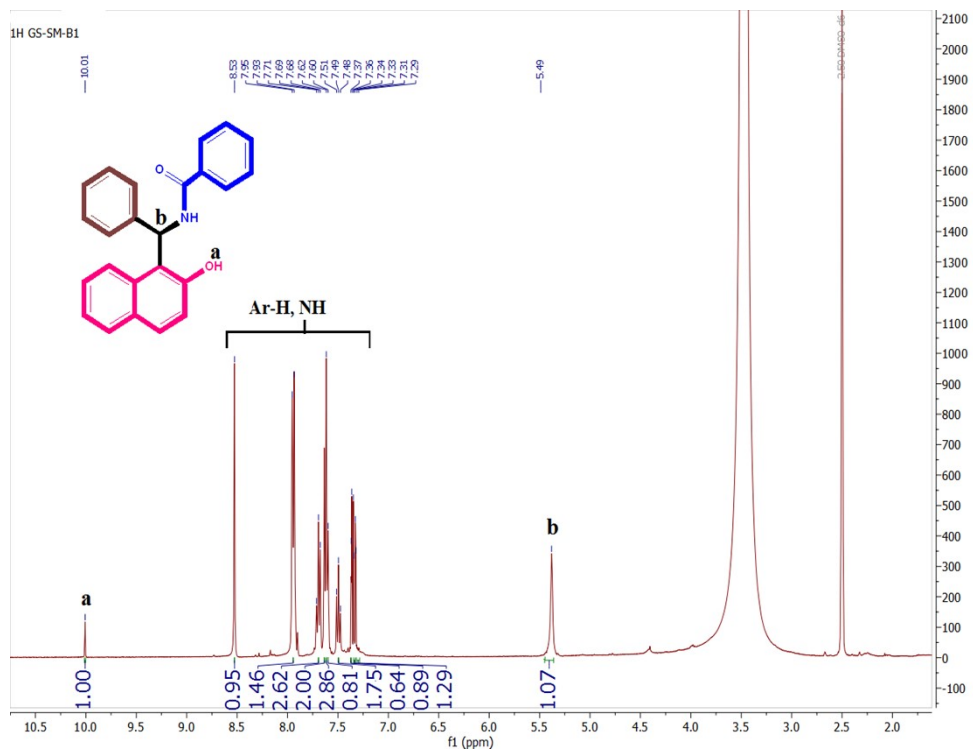

Fig.S2(j).  $^1\text{H}$  NMR spectra of 4j

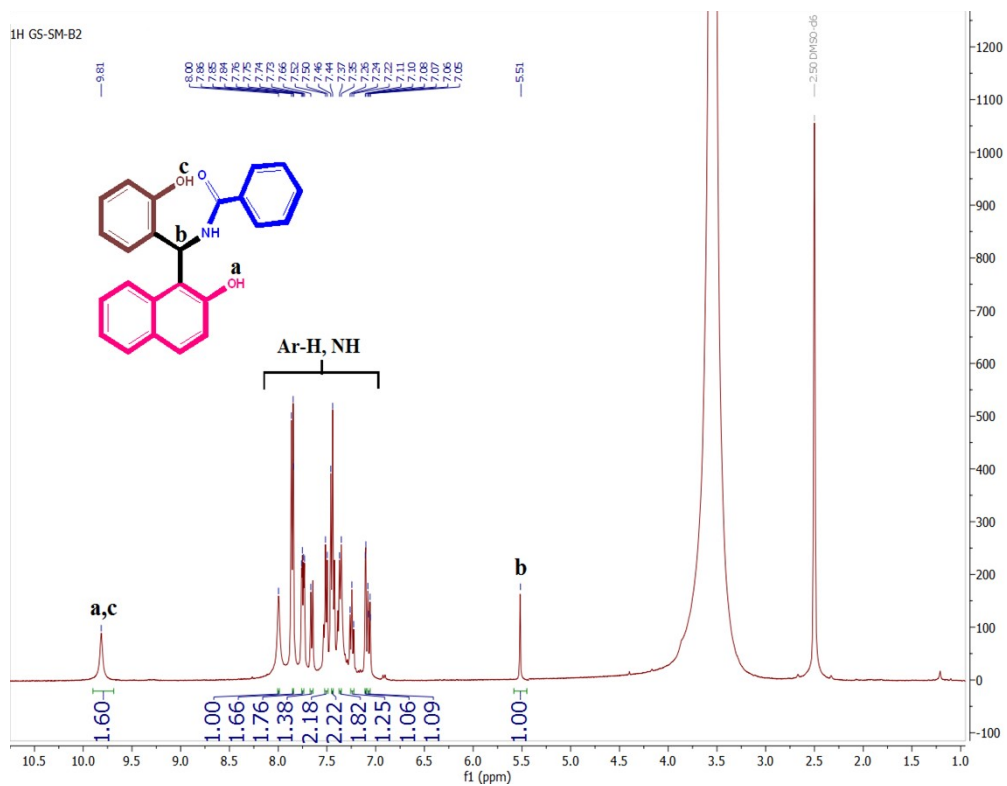

Fig.S2(k). <sup>1</sup>H NMR spectra of 4k

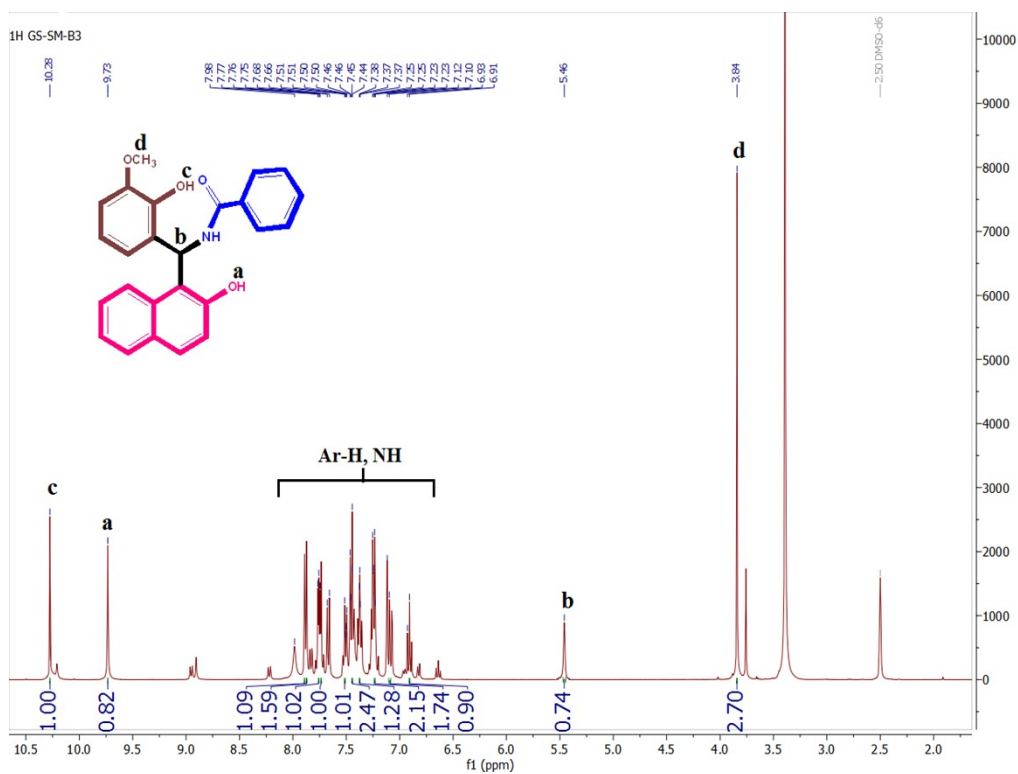

Fig.S2(l). <sup>1</sup>H NMR spectra of 4l



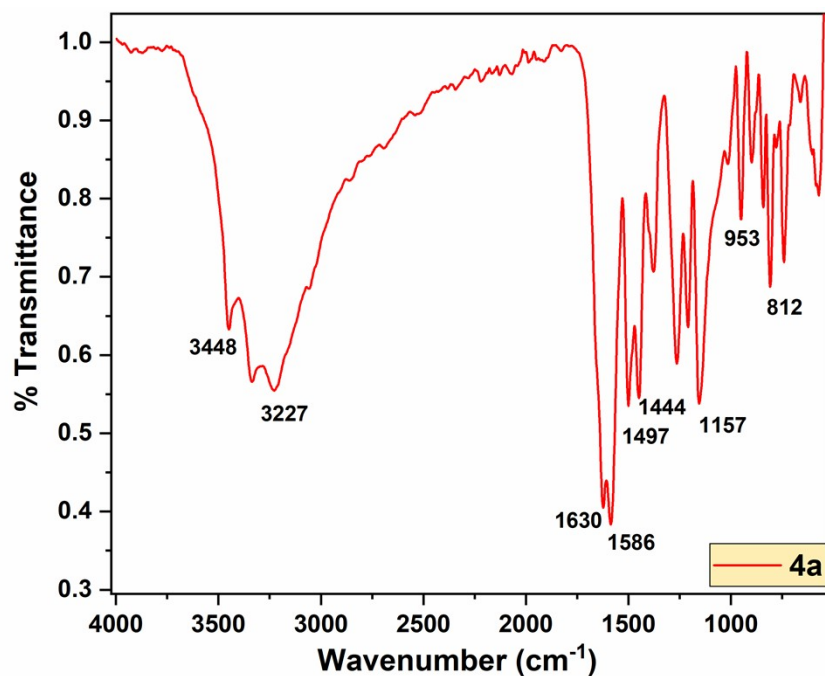

Fig.S3(a). IR spectra of 4a

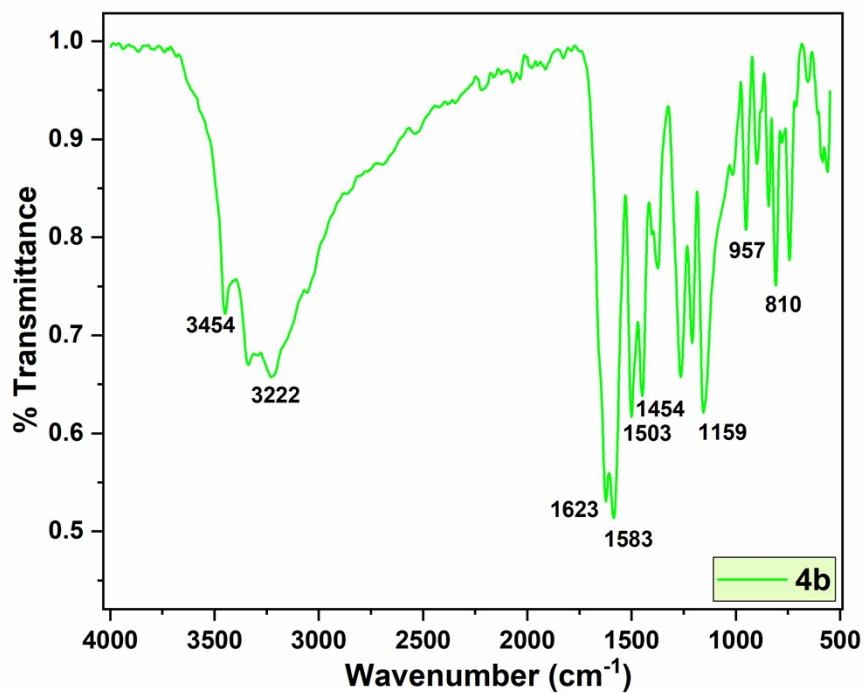

Fig.S3(b). IR spectra of 4b

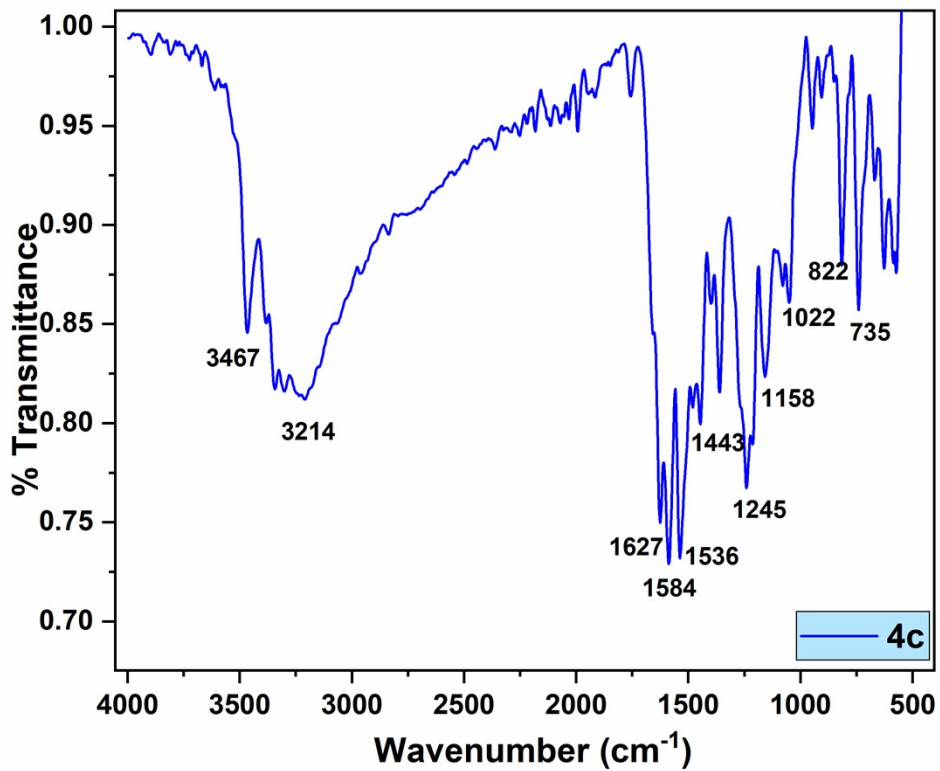

.S3(c). IR spectra of 4c

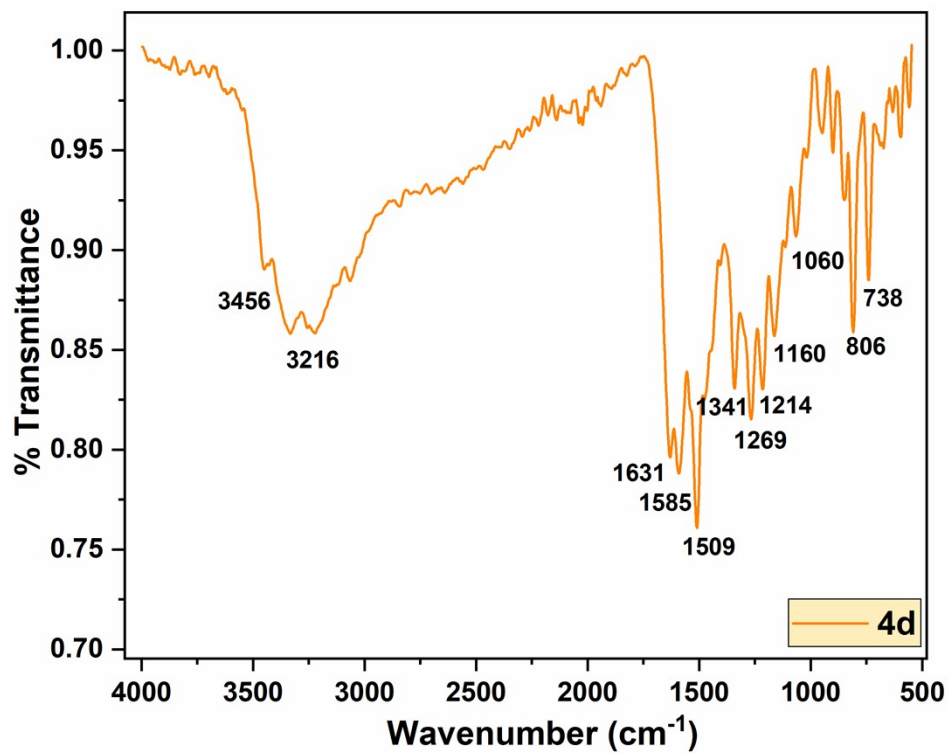

Fig.S3(d). IR spectra of 4d

Fig

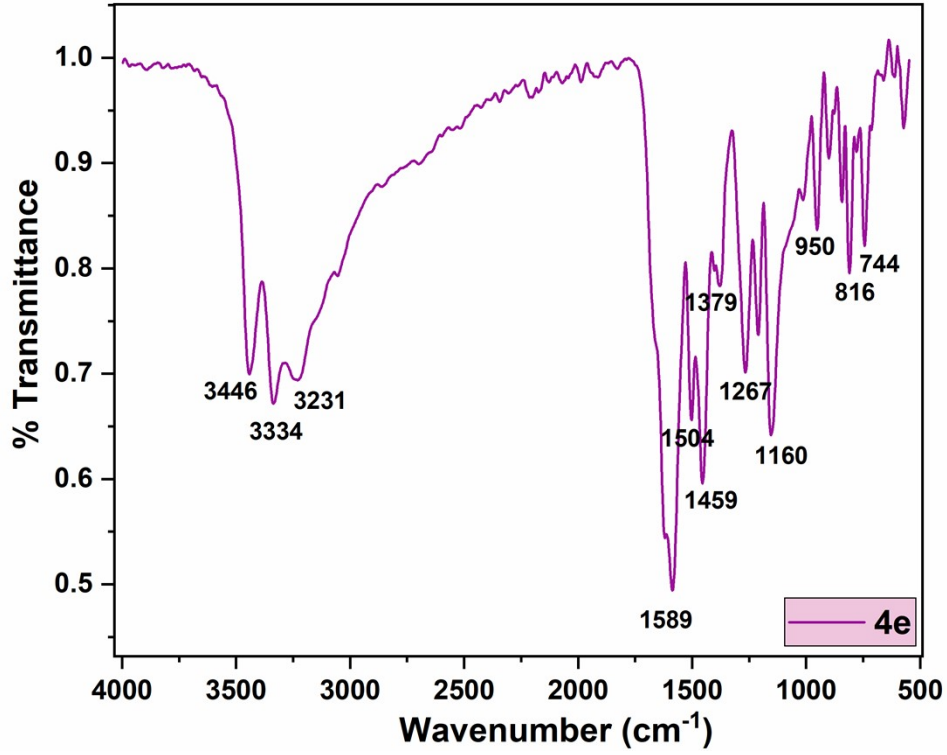

Fig.S3(e). IR spectra of 4e

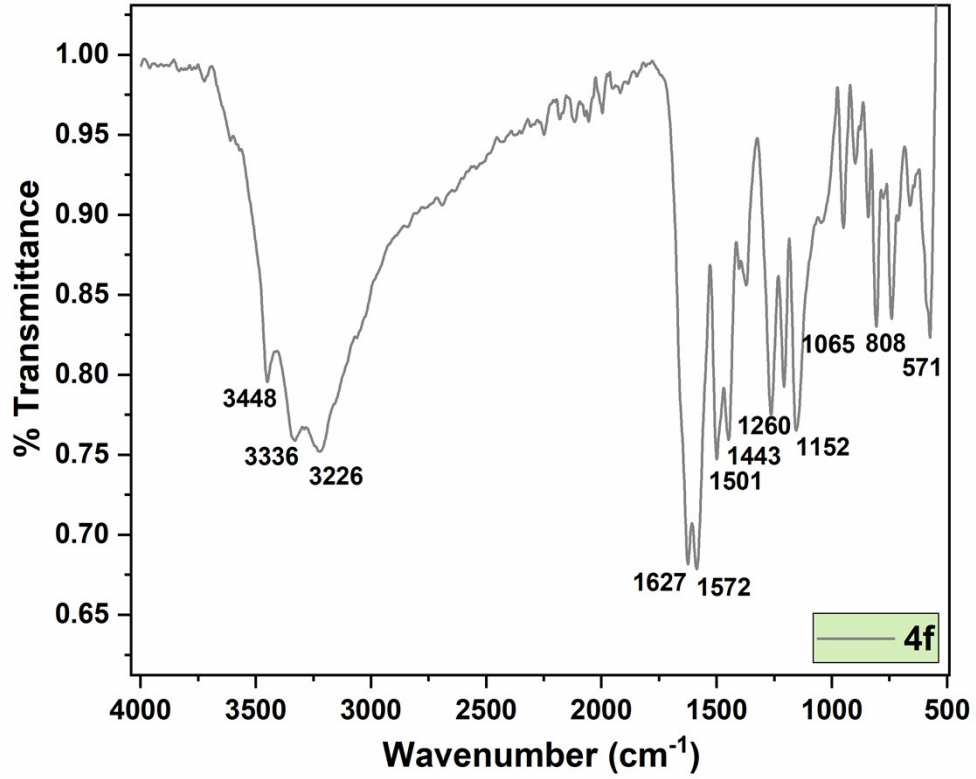

Fig

.S3(f). IR spectra of 4f

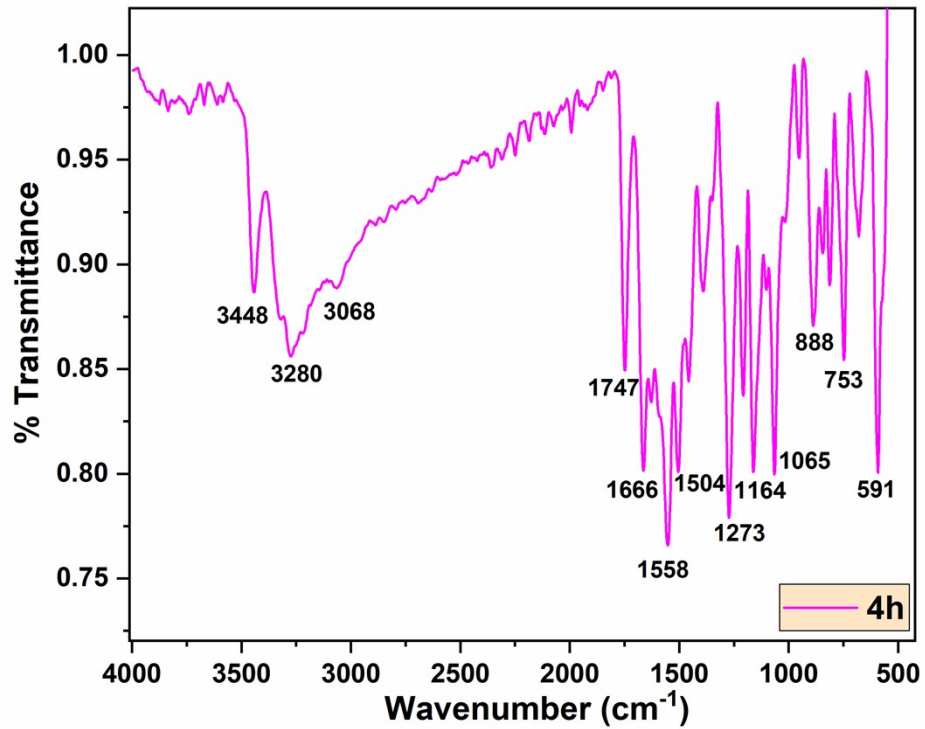

Fig.S3(g). IR spectra of 4h

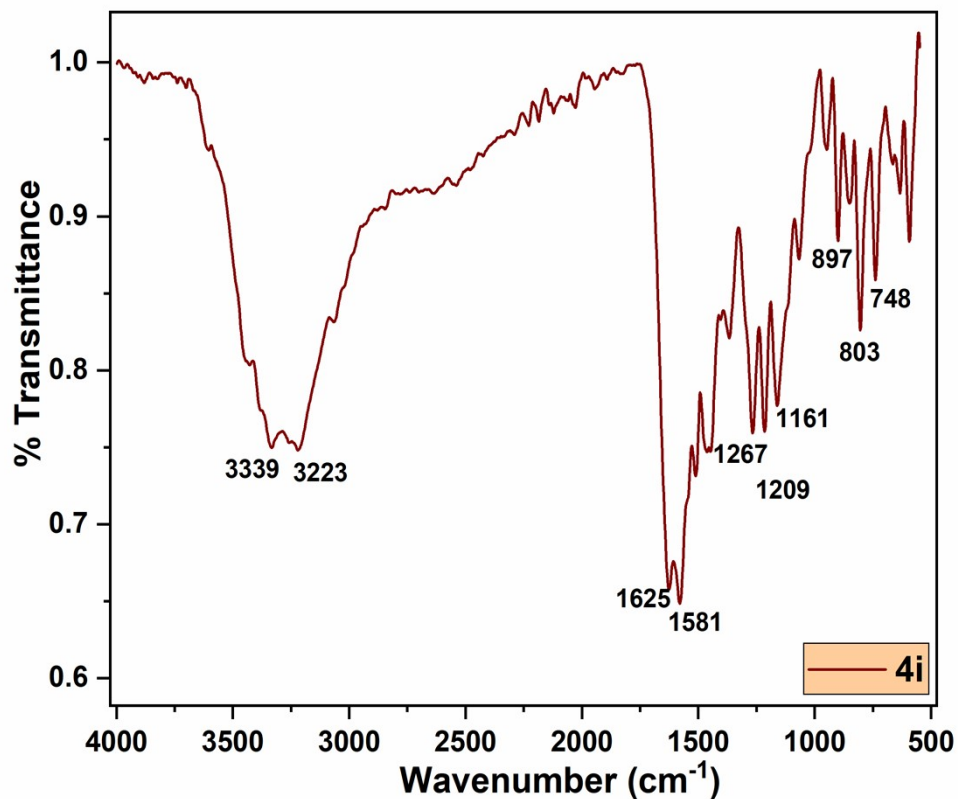

Fig.S3(h). IR spectra of 4i

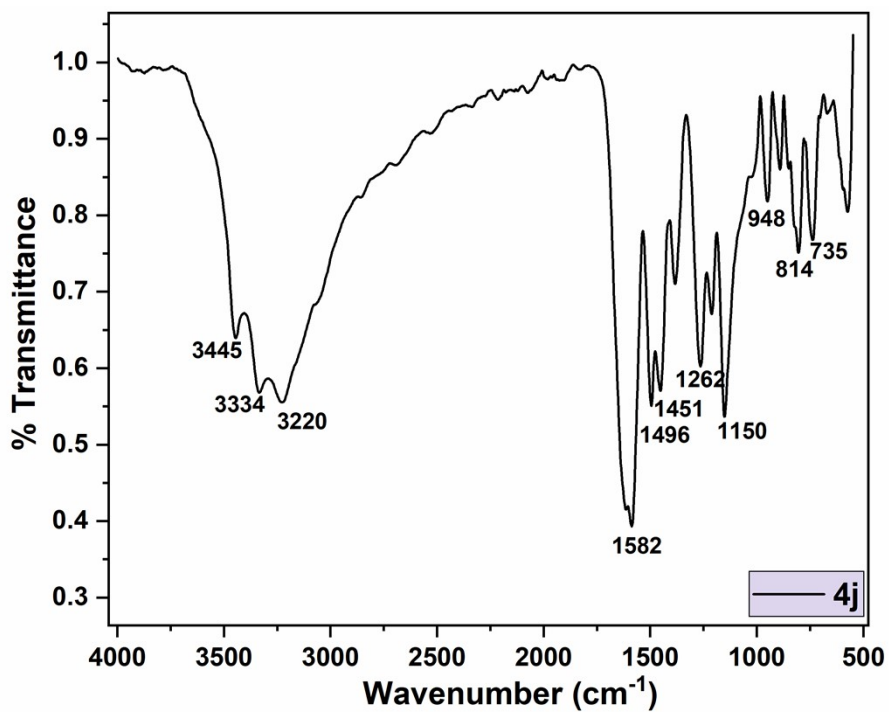

Fig.S3(i). IR spectra of 4j

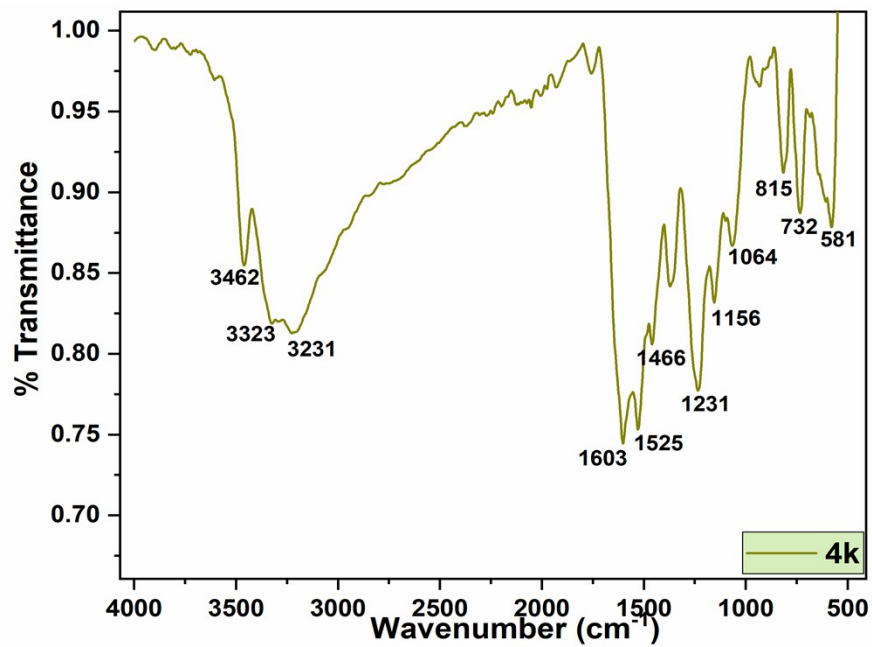

Fig.S3(j). IR spectra of 4k

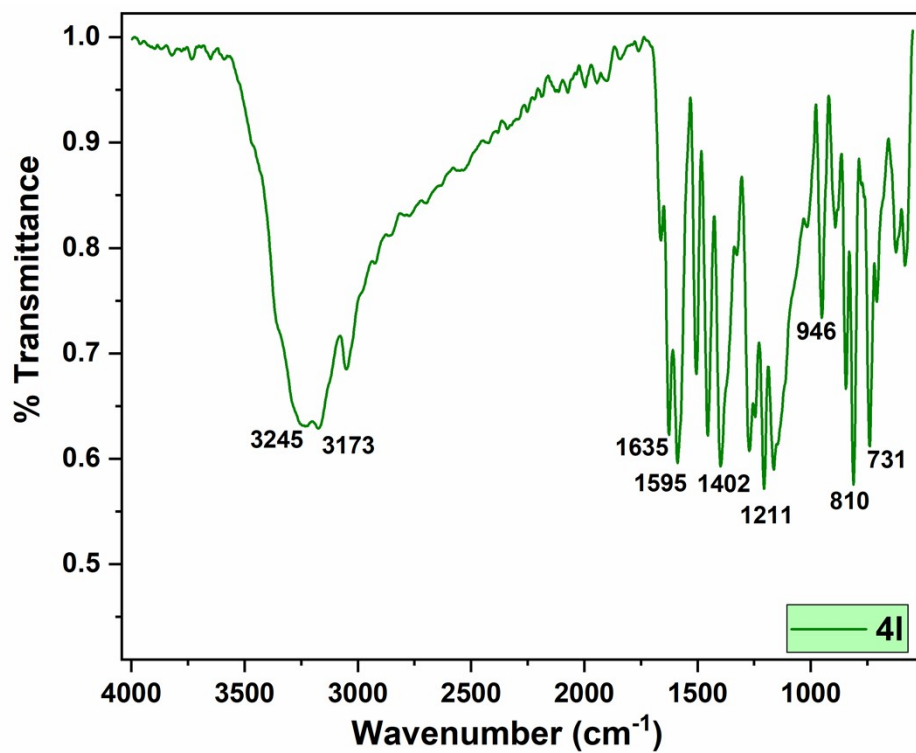

Fig.S3(k). IR spectra of 4l

## **Spectral analysis of the synthesized 1-amidoalkyl-2-naphthol derivatives**

### **4a. 1-(naphthalen-1-yl(phenyl)methyl)urea**

Appearance- white solid, M.P: 218-220 °C

$^1\text{H}$  NMR (500 MHz, DMSO- $d_6$ )  $\delta$  (ppm): 9.71(s, 1H, OH), 7.06-7.77 (m, 14H, Ar-H, NH, NH<sub>2</sub>), 5.41 (s, 1H, CH); IR ( $\nu$ ,  $\text{cm}^{-1}$ ): 3448, 3227, 1630, 1586, 1497, 1444, 1157, 953, 812

### **4b. 1-((2-hydroxyphenyl)(naphthalen-1-yl)methyl)urea**

Appearance- white solid, M.P: 215-217°C

$^1\text{H}$  NMR (500 MHz, DMSO- $d_6$ )  $\delta$  (ppm): 9.71(s, 2H, 2OH), 7.07-7.76 (m, 13H, Ar-H, NH, NH<sub>2</sub>), 5.40 (s, 1H, CH); IR ( $\nu$ ,  $\text{cm}^{-1}$ ): 3454, 3222, 1623, 1583, 1503, 1454, 1159, 957, 810

### **4c. 1-((2-hydroxy-3-methoxyphenyl)(naphthalen-1-yl)methyl)urea**

Appearance- yellow solid, M.P: 221-225°C

$^1\text{H}$  NMR (500 MHz, DMSO- $d_6$ )  $\delta$  (ppm): 10.26 (s, 1H, OH), 9.81(s, 1H, OH), 6.61-8.00 (m, 12H, Ar-H, NH,  $\text{NH}_2$ ), 5.97 (s, 1H, CH); 3.82 (s, 3H,  $\text{OCH}_3$ ); IR ( $\nu$ ,  $\text{cm}^{-1}$ ):3467, 3214, 1627, 1584, 1536, 1443, 1245, 1158, 1022, 822, 735

#### **4d.1-(naphthalen-1-yl(4-nitrophenyl)methyl)urea**

Appearance- brown, M.P: 200-202°C

$^1\text{H}$  NMR (500 MHz, DMSO- $d_6$ )  $\delta$  (ppm): 10.15 (s, 1H, OH), 7.06-8.42 (m, 13H, Ar-H, NH,  $\text{NH}_2$ ), 5.45 (s, 1H, CH); IR ( $\nu$ ,  $\text{cm}^{-1}$ ):3456, 3216, 1631, 1586, 1509, 1341, 1269, 1214,1160, 1060, 806, 738

#### **4e. 1-((4-chlorophenyl)(naphthalen-1-yl)methyl)urea**

Appearance- yellow solid, M.P: 160-163°C

$^1\text{H}$  NMR (500 MHz, DMSO- $d_6$ )  $\delta$  (ppm): 9.75 (s, 1H, OH), 7.06-8.19 (m, 13H, Ar-H, NH,  $\text{NH}_2$ ), 5.42 (s, 1H, CH); IR ( $\nu$ ,  $\text{cm}^{-1}$ ): 3446, 3334, 3231, 1589, 1504, 1459, 1379, 1267, 1160, 950, 816, 744

#### **4f. 1-((4-methoxyphenyl)(naphthalen-1-yl)methyl)urea**

Appearance-white, M.P: 205-208

$^1\text{H}$  NMR (500 MHz, DMSO- $d_6$ )  $\delta$  (ppm): 9.86 (s, 1H, OH), 6.70-7.88 (m, 13H, Ar-H, NH,  $\text{NH}_2$ ), 5.42 (s, 1H, CH), 3.76 (s, 3H,  $\text{OCH}_3$ ); IR ( $\nu$ ,  $\text{cm}^{-1}$ ):3448, 3336, 3226, 1627, 1572, 1501, 1443, 1260, 1152, 1065, 808, 571

#### **4g. 2-(naphthalen-1-yl(ureido)methyl)benzoic acid**

Appearance- white, M.P: 176-179°C

$^1\text{H}$  NMR (500 MHz, DMSO- $d_6$ )  $\delta$  (ppm): 10.45(s, 1H,  $\text{COOH}$ ), 9.72 (s, 1H, OH), 6.97-7.83 (m, 13H, Ar-H, NH,  $\text{NH}_2$ ), 5.41 (s, 1H, CH);

#### **4h. 1-((4-bromo-2-hydroxyphenyl)(naphthalen-1-yl)methyl)urea**

Appearance- grey sticky solid, M.P: 207-209 °C



$^1\text{H}$  NMR (500 MHz, DMSO- $d_6$ )  $\delta$  (ppm): 10.23(s, 1H, OH), 9.74 (s, 1H, OH), 6.83-7.83 (m, 13H, Ar-H, NH, NH<sub>2</sub>), 5.43 (s, 1H, CH).

**4i. 1-((2-hydroxy-4-methoxyphenyl)(naphthalen-1-yl)methyl)urea**

Appearance- yellow solid, M.P: 198-200°C

$^1\text{H}$  NMR (500 MHz, DMSO- $d_6$ )  $\delta$  (ppm): 9.72(s, 1H, OH), 6.62-7.77 (m, 12H, Ar-H, NH, NH<sub>2</sub>), 5.41 (s, 1H, CH), 3.90 (s, 3H, OCH<sub>3</sub>); IR ( $\nu$ ,  $\text{cm}^{-1}$ ):3339, 3223, 1625, 1581, 1267, 1209, 1161, 897, 803, 748

**4j. N-(naphthalen-1-yl(phenyl)methyl)benzamide**

Appearance- white, M.P: 223-226°C

$^1\text{H}$  NMR (500 MHz, DMSO- $d_6$ )  $\delta$  (ppm): 10.01(s, 1H, OH), 7.29-8.53 (m, 17H, Ar-H, NH, NH<sub>2</sub>), 5.49 (s, 1H, CH); IR ( $\nu$ ,  $\text{cm}^{-1}$ ): 3445, 3334, 3220, 1582, 1496, 1451, 1262, 1150, 948, 814, 735

**4k. N-((2-hydroxyphenyl)(naphthalen-1-yl)methyl)benzamide**

Appearance- grey, M.P: 230-234°C

$^1\text{H}$  NMR (500 MHz, DMSO- $d_6$ )  $\delta$  (ppm): 9.81 (s, 2H, 2OH), 7.05-8.00 (m, 16H, Ar-H, NH, NH<sub>2</sub>), 5.51 (s, 1H, CH); IR ( $\nu$ ,  $\text{cm}^{-1}$ ): 3462, 3323, 3231, 1603, 1525, 1466, 1231, 1156, 1064, 815, 732, 581

**4l. N-((2-hydroxy-3-methoxyphenyl)(naphthalen-1-yl)methyl)benzamide**

Appearance- grey, M.P: 227-230°C

$^1\text{H}$  NMR (500 MHz, DMSO- $d_6$ )  $\delta$  (ppm): 10.28(s, 1H, OH), 9.73(s, 1H, OH), 6.91-7.98 (m, 15H, Ar-H, NH, NH<sub>2</sub>), 5.46 (s, 1H, CH), 3.84 (s, 3H, OCH<sub>3</sub>); IR ( $\nu$ ,  $\text{cm}^{-1}$ ):3245, 3173, 1635, 1595, 1402, 1211, 946, 810, 731
